# Supplementary material for: Restoring a butterfly hot spot by large ungulates refaunation: the case of the Milovice military training range, Czech Republic
Source: BMC Ecol Evol. 2021 Apr 30;21:73. doi: 10.1186/s12862-021-01804-x (PMC8086344; doi:10.1186/s12862-021-01804-x)
Supplement: Supplementary file 3 — Additional file 3. CCA scores of individual butterfly species, plus species weights, from the current monitoring ordination analyses, final covariate models for refaunation + tanks and ungulates + tanks effects. [file 12862_2021_1804_MOESM3_ESM.xlsx]

## Sheet: CCA analysis "refaunation"
Genus	species	CCA axis1	CCA axis2	CCA axis3	Species weight
		Low vlaues = refaunation, high values = neglect	High values = cattle and/or tanks	Highe values = cattle, low values = tanks.
Satyrium	acaciae	-0.8442	-0.8019	-0.3442	0.0463
Argynnis	adippe	0.7968	0.37	-0.0959	0.0154
Pararge	aegeria	0.6385	1.467	2.529	0.0154
Aricia	agestis	-0.6848	-0.1142	0.2567	0.386
Argynnis	aglaja	0.4582	-0.9273	-0.0795	0.0618
Carcarodus	alceae	-0.6587	-0.9157	0.2755	0.4169
Phengaris	alcon	-0.5629	-0.5726	0.1496	5.3205
Colias	alfacariensis	-0.1081	0.0643	0.079	340.219
Polyommatus	amandus	-0.0841	-0.2521	-0.1464	2.3689
Coenonympha	arcania	0.1551	-0.0356	-0.1847	107.079
Celastrina	argiolus	-0.3102	-0.0896	0.06	0.7916
Plebejus	argus	-0.1451	-0.0714	-0.0112	516.704
Plebejus	argyrognomon	-0.0284	0.0112	0.0306	259.755
Vanessa	atalanta	-0.3252	0.1009	-0.0786	3.9528
Polyommatus	bellargus	-1.5245	0.2492	-0.5323	0.0489
Pieris	brassicae	-0.0668	0.1795	0.0757	57.7374
Polyogonia	c-album	0.9784	-0.0423	-1.1162	0.0618
Anthocharis	cardamines	-0.164	-0.0407	-0.061	4.9229
Vanessa	cardui	0.1283	0.0519	-0.0779	120.292
Hesperia	comma	0.4013	0.3225	0.2527	16.0451
Polyommatus	coridon	-0.0654	0.0622	0.0032	210.239
Colias	crocea	-0.6767	0.1735	0.0741	1.9188
Polyommatus	daphnis	-0.2946	-0.1668	-0.0965	48.7845
Boloria	dia	0.7094	0.0505	0.142	33.6107
Lycaena	dispar	0.3063	-0.1081	0.0763	2.3444
Pontia	edusa	-0.3787	0.1803	-0.1024	78.1587
Melanargia	galathea	0.2323	-0.0096	-0.0092	317.527
Coenonympha	glycerion	0.2912	0.062	0.0442	107.669
Aphantopus	hyperantus	0.1373	0.0089	-0.0403	108.524
Polyommatus	icarus	-0.0949	0.0622	0.0504	298.943
Inachis	io	-0.0777	0.2635	-0.108	27.6926
Apatura	iris	0.0002	1.3542	-1.793	0.0154
Maniola	jurtina	0.0487	0.0044	-0.0201	305.714
Leptidea	juvernica	0.0266	-0.1187	-0.0312	238.122
Issoria	lathonia	-0.2245	-0.1904	-0.2742	2.9762
Araschnia	levana	-0.0914	-0.2772	0.0423	13.5398
Thymelicus	lineola	0.1162	0.0745	-0.0354	143.954
Papilio	machaon	-0.053	0.6	-0.1512	9.8779
Pyrgus	malvae	-0.1572	-0.2706	0.1154	18.9267
Erebia	medusa	0.3062	-0.2187	-0.0263	63.1411
Lasiommata	megera	-0.2238	-0.3716	-0.2974	7.8629
Cupido	minimus	-0.0923	0.3714	0.0184	12.4975
Pieris	napi	-0.1926	-0.0619	-0.0592	79.1934
Carterocephalus	palaemon	-0.2299	-0.1548	-0.3218	1.9095
Coenonympha	pamphilus	0.0164	-0.066	0.0362	613.564
Argynnis	paphia	0.5817	-0.1922	0.2231	4.1083
Lycaena	phlaeas	-0.2451	-0.0137	0.2263	6.1269
Iphiclides	podalirius	-0.0836	0.1118	0.2107	17.2815
Vanessa	polycloros	1.4082	-0.4022	0.5663	0.0154
Satyrium	pruni	-0.5791	-0.975	0.6942	0.0154
Pieris	rapae	-0.0108	0.0248	0.0067	364.349
Gonepteryx	rhamni	-0.0643	0.2517	-0.0186	21.431
Callophrys	rubi	0.0002	1.3542	-1.793	0.0154
Spialia	sertorius	-0.0732	0.7309	-0.4867	5.4917
Satyrium	spini	1.2193	-0.2788	-0.1734	0.0245
Ochlodes	sylvanus	0.1923	-0.0169	-0.0926	22.3811
Thymelicus	sylvestris	0.0673	0.1253	-0.1508	74.5414
Erynnis	tages	-0.0568	-0.0217	0.0172	184.038
Lycaena	tityrus	-0.0883	0.0742	-0.3812	1.7368
Aglais	urticae	-0.1544	0.0082	-0.5292	0.5559
Lycaena	virgaureae	-0.4045	-0.5991	0.0878	0.386

## Sheet: CCA analysis "ungulates"
Genus	species	CCA axis1	CCA axis2	CCA axis3	CCA axis4	Species weight
		Increases towards ungulates, decreases towards neglect	Low values =close association with cattle and tanks	High values = cattle and/or auroch; low values = wisent	High values = cattle, low values = tanks.
Satyrium	acaciae	0.6701	0.4546	-1.112	-0.0243	0.0463
Argynnis	adippe	-1.0244	-0.4625	-0.5945	0.6331	0.0154
Pararge	aegeria	-0.6431	-0.9325	1.305	2.0565	0.0154
Aricia	agestis	0.5989	0.0173	-0.3584	0.3383	0.386
Argynnis	aglaja	-0.4681	0.8337	-0.3275	-0.2275	0.0618
Carcarodus	alceae	0.7275	0.8985	-0.0612	-0.1485	0.4169
Phengaris	alcon	0.5531	0.489	-0.2606	-0.0096	5.3205
Colias	alfacariensis	0.1246	-0.0293	0.0966	0.0427	340.219
Polyommatus	amandus	0.0283	0.1181	-0.3601	-0.0802	2.3689
Coenonympha	arcania	-0.1795	-0.0379	-0.1538	-0.1291	107.079
Celastrina	argiolus	0.2241	0.0135	-0.3477	0.2566	0.7916
Plebejus	argus	0.1324	0.0512	-0.086	0.0202	516.704
Plebejus	argyrognomon	0.0054	-0.0381	-0.0795	0.0597	259.755
Vanessa	atalanta	0.2158	-0.2382	-0.4317	0.1868	3.9528
Polyommatus	bellargus	1.3019	-0.6964	-1.1189	-0.002	0.0489
Pieris	brassicae	0.0631	-0.1553	0.0642	0.1018	57.7374
Polyogonia	c-album	-0.7503	0.1079	0.5754	-1.3628	0.0618
Anthocharis	cardamines	0.0367	-0.1169	-0.521	0.2109	4.9229
Vanessa	cardui	-0.1355	-0.0609	-0.0179	-0.0312	120.292
Hesperia	comma	-0.306	-0.0891	0.6099	0.12	16.0451
Polyommatus	coridon	0.047	-0.1004	-0.0666	0.0144	210.239
Colias	crocea	0.6472	-0.2577	-0.1345	0.0653	1.9188
Polyommatus	daphnis	0.359	0.1801	0.1113	-0.252	48.7845
Boloria	dia	-0.7107	0.0756	0.1774	0.2284	33.6107
Lycaena	dispar	-0.3559	0.0687	-0.1632	0.1295	2.3444
Pontia	edusa	0.368	-0.1926	-0.0424	0.014	78.1587
Melanargia	galathea	-0.2282	0.0143	0.0306	-0.0327	317.527
Coenonympha	glycerion	-0.2911	-0.0549	0.0564	0.0074	107.669
Aphantopus	hyperantus	-0.1746	-0.0418	-0.1277	0.0598	108.524
Polyommatus	icarus	0.1091	-0.0372	0.0783	0.0202	298.943
Inachis	io	0.0343	-0.2983	-0.1075	0.0772	27.6926
Apatura	iris	0.0485	-1.4538	0.1018	-1.1169	0.0154
Maniola	jurtina	-0.0362	-0.018	0.0312	-0.0865	305.714
Leptidea	juvernica	-0.0181	0.1141	-0.015	-0.0609	238.122
Issoria	lathonia	0.3362	0.1732	0.1991	-0.577	2.9762
Araschnia	levana	0.1012	0.2493	-0.0649	-0.0691	13.5398
Thymelicus	lineola	-0.1172	-0.0737	0.0214	-0.0183	143.954
Papilio	machaon	0.0146	-0.6003	0.0175	0.1063	9.8779
Pyrgus	malvae	0.2233	0.5081	0.2786	0.2149	18.9267
Erebia	medusa	-0.345	0.1596	-0.1951	0.0039	63.1411
Lasiommata	megera	0.1582	0.2084	-0.4852	-0.1497	7.8629
Cupido	minimus	0.1917	-0.2819	0.4581	-0.208	12.4975
Pieris	napi	0.2067	0.0834	0.0093	-0.0281	79.1934
Carterocephalus	palaemon	0.0894	-0.0356	-0.6733	0.0935	1.9095
Coenonympha	pamphilus	-0.0059	0.0983	0.0414	0.0284	613.564
Argynnis	paphia	-0.4657	0.3258	0.4755	-0.1811	4.1083
Lycaena	phlaeas	0.3486	0.1133	0.3969	-0.112	6.1269
Iphiclides	podalirius	0.12	-0.0446	0.2195	0.0779	17.2815
Vanessa	polycloros	-1.7611	0.1946	-1.0751	1.1395	0.0154
Satyrium	pruni	0.7798	1.1429	0.529	-0.1676	0.0154
Pieris	rapae	0.0048	-0.0473	-0.0242	-0.0116	364.349
Gonepteryx	rhamni	0.0758	-0.2352	0.1072	-0.0117	21.431
Callophrys	rubi	0.0485	-1.4538	0.1018	-1.1169	0.0154
Spialia	sertorius	0.1308	-0.7422	0.2692	-0.434	5.4917
Satyrium	spini	-1.0075	0.372	0.6909	-0.8639	0.0245
Ochlodes	sylvanus	-0.2047	-0.0204	-0.0678	-0.0748	22.3811
Thymelicus	sylvestris	-0.0684	-0.1341	0.0018	-0.08	74.5414
Erynnis	tages	0.0537	0.0311	-0.0114	0.0411	184.038
Lycaena	tityrus	0.1407	-0.0784	0.0917	-0.372	1.7368
Aglais	urticae	0.2713	-0.0432	0.214	-0.7417	0.5559
Lycaena	virgaureae	0.4655	0.5791	-0.0135	-0.2187	0.386
